# Supplementary material
Source: PubMed Central journal article supplement (PMC10328065)
Supplement: EMBR-24-e56458-s006.pdf [file EMBR-24-e56458-s006.pdf]

## Appendix

### ***O*-GlcNAcylation promotes topoisomerase II $\alpha$ catalytic activity in breast cancer chemoresistance**

#### Table of content

| Content            | Page |
|--------------------|------|
| Appendix Figure S1 | 2    |
| Appendix Figure S2 | 3    |
| Appendix Figure S3 | 4    |
| Appendix Figure S4 | 5    |
| Appendix Figure S5 | 6    |
| Appendix Table S1  | 7    |
| Appendix Table S2  | 8    |
| Appendix Table S3  | 10   |
| Appendix Table S4  | 12   |

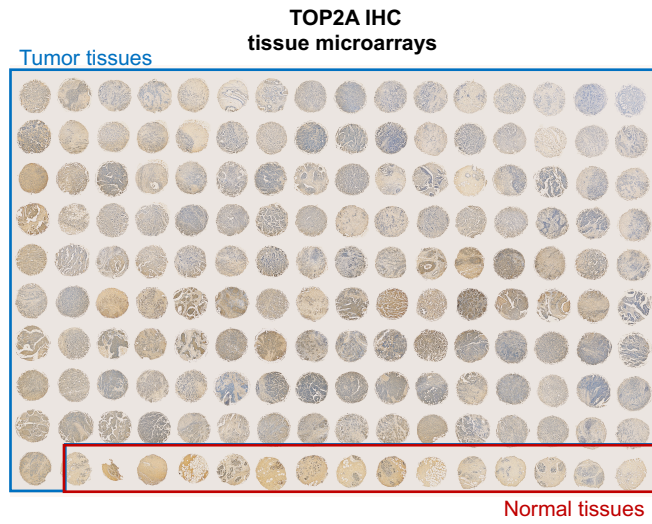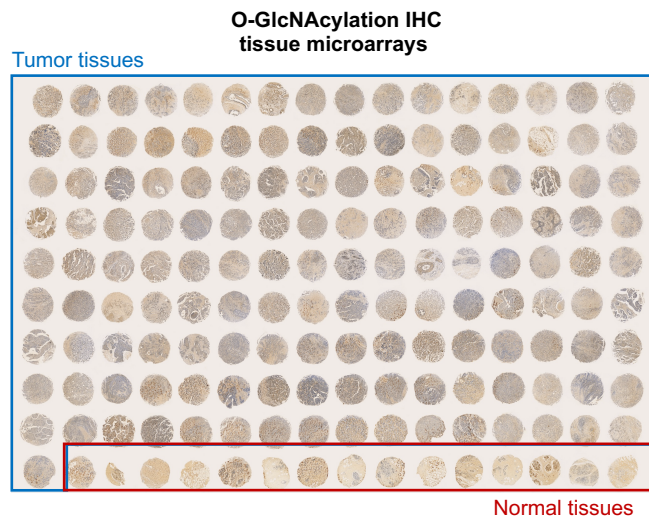

**Appendix Figure S1** Layout and IHC staining of TOP2A and cellular O-GlcNAcylation on a tissue microarray containing 145 breast tumor and 15 adjacent samples.

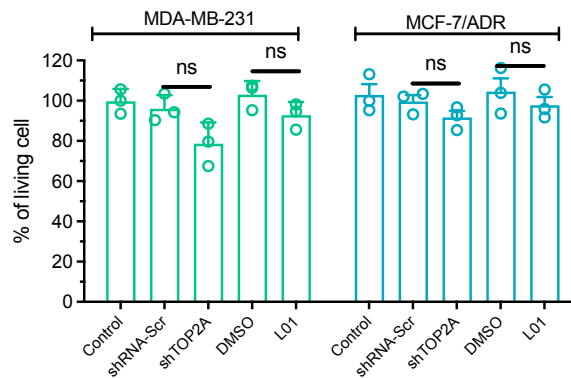

**Appendix Figure S2** MDA-MB-231 and MCF-7/ADR cells were transfected with scrambled shRNA (shRNA-Scr) or TOP2A shRNA (shTOP2A) for 48 h. Or the cells were treated with 50  $\mu$ M L01 for 48 h. The cell viability was assessed through a CCK-8 assay. Protein expression were shown in Figure 2D and E. OGT inhibition itself or TOP2A shRNA transfection itself did not have significant impact on the cell viability in MDA-MB-231 and MCF-7/ADR cells.  $n = 3$  biologically replicates. Unpaired t-test was used for statistical comparison.  $p$  value was indicted.

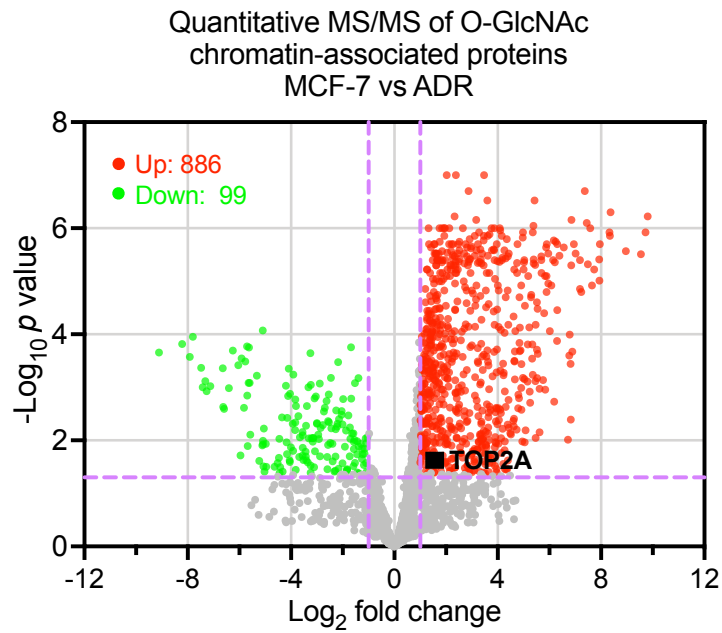

**Appendix Figure S3** TOP2A was previously reported to be a O-GlcNAcylated chromatin-associated protein (*Liu Y, Chen Q, Zhang N, et al. Proteomic profiling and genome-wide mapping of O-GlcNAc chromatin-associated proteins reveal an O-GlcNAc-regulated genotoxic stress response[J]. Nature communications, 2020, 11, 5898*). Volcano plot of label-free relative quantitative proteomics data of O-GlcNAc chromatin-associated proteins in MCF-7 and MCF-7/ADR cells (n = 9 biologically replicates, unpaired t-test). TOP2A was labelled.

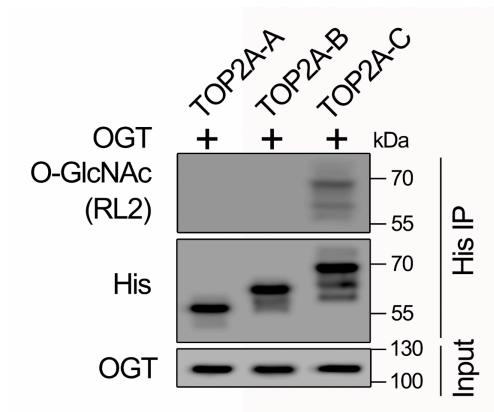

**Appendix Figure S4** His-tagged TOP2A-A, -B and -C expression plasmids were transfected with the OGT expression plasmid in HEK-293T cells. After 48 h, His-tag IP was performed, and the immunoprecipitated fractions were analyzed by Western blot for the indicated proteins.

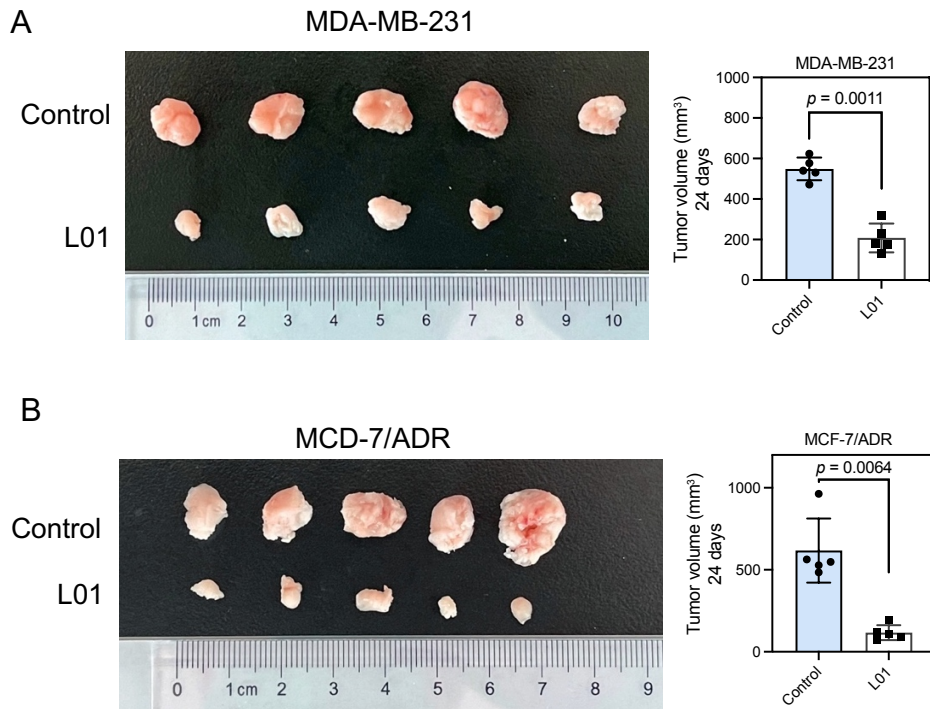

**Appendix Figure S5** The effects of L01 on tumor xenografts in nude mice. (A) MDA-MB-231 cells were injected subcutaneously into the axillae of nude mice ( $n = 5$  for each group). 1 mg/kg L01 was administered by tail vein injection every other day for 22 days. Control group was treated with DMSO. Volumes of tumors were monitored with caliper twice a week until 24 days. Unpaired t-test was used for statistical comparison.  $p$  value was indicated. (B) MCF-7/ADR cells were injected subcutaneously into the axillae of nude mice ( $n = 5$  for each group). 4 mg/kg Adm and 1 mg/kg L01 was administered by tail vein injection. Control group was treated with DMSO. Volumes of tumors were monitored with caliper twice a week until 24 days. Unpaired t-test was used for statistical comparison.  $p$  value was indicated.

### Appendix Table S1

The relationship between *TOP2A* mRNA expression and clinicopathological factors in 1072 TCGA breast cancer patients (female).

| Variables               | No. of patients | TOP2A |      | Chi-Square | <i>p</i> value |
|-------------------------|-----------------|-------|------|------------|----------------|
|                         |                 | low   | high |            |                |
| <b>Age</b>              |                 |       |      |            |                |
| < 50                    | 292             | 139   | 153  | 0.9225     | 0.3368         |
| ≥ 50                    | 780             | 397   | 383  |            |                |
| <b>Stage</b>            |                 |       |      |            |                |
| I                       | 188             | 115   | 73   | 11.38      | 0.0007***      |
| II + III + IV + X       | 884             | 421   | 463  |            |                |
| <b>T classification</b> |                 |       |      |            |                |
| T1                      | 278             | 168   | 110  | 16.34      | < 0.0001****   |
| T2 + T3 + T4            | 794             | 368   | 426  |            |                |
| <b>N classification</b> |                 |       |      |            |                |
| NX + N0                 | 523             | 265   | 258  | 0.1829     | 0.6689         |
| N1 + N2 + N3            | 549             | 271   | 278  |            |                |

The cutoff for high and low TOP2A expression were  $\geq$  median or  $<$  median, \*\*\* $p < 0.001$ , \*\*\*\* $p < 0.0001$

**Appendix Table S2**

The relationship between TOP2A protein expression and clinicopathological factors in 145 breast tumor samples on a tissue microarray.

| Variables                    | No. of patients (female) | TOP2A |      | Chi-Square | <i>p</i> value |
|------------------------------|--------------------------|-------|------|------------|----------------|
|                              |                          | low   | high |            |                |
| <b>Age</b>                   |                          |       |      |            |                |
| < 50                         | 70                       | 30    | 40   | 0.6109     | 0.4344         |
| ≥ 50                         | 75                       | 37    | 38   |            |                |
| <b>Grade</b>                 |                          |       |      |            |                |
| 1                            | 31                       | 20    | 11   | 5.318      | 0.0211*        |
| 2 + 3                        | 114                      | 47    | 67   |            |                |
| <b>Stage</b>                 |                          |       |      |            |                |
| 0 + I                        | 10                       | 6     | 4    | 0.3341     | 0.5633         |
| II + III                     | 135                      | 61    | 74   |            |                |
| <b>T classification</b>      |                          |       |      |            |                |
| Tis + T1 + T2                | 93                       | 50    | 43   | 5.957      | 0.0147*        |
| T3 + T4                      | 52                       | 17    | 35   |            |                |
| <b>N classification</b>      |                          |       |      |            |                |
| N0 + N1                      | 119                      | 56    | 63   | 0.1938     | 0.6598         |
| N2 + N3                      | 26                       | 11    | 15   |            |                |
| <b>Lymph node metastasis</b> |                          |       |      |            |                |
| No                           | 96                       | 50    | 46   | 3.947      | 0.047*         |
| Yes                          | 49                       | 17    | 32   |            |                |
| <b>PR</b>                    |                          |       |      |            |                |
| Negative                     | 107                      | 46    | 61   | 1.699      | 0.1924         |
| Positive                     | 38                       | 21    | 17   |            |                |
| <b>ER</b>                    |                          |       |      |            |                |
| Negative                     | 110                      | 52    | 58   | 0.2083     | 0.6481         |



|          |    |    |    |        |        |
|----------|----|----|----|--------|--------|
| Positive | 35 | 15 | 20 |        |        |
| HER2     |    |    |    |        |        |
| Negative | 65 | 33 | 32 | 0.9866 | 0.3206 |
| Positive | 80 | 34 | 46 |        |        |

High group: IHC score  $\geq 4$  (median score), low group: IHC score  $< 3$ ,  $*p < 0.05$ .

**Appendix Table S3**

The relationship between cellular O-GlcNAcylation expression and clinicopathological factors in 145 breast tumor samples on a tissue microarray.

| Variables                    | No. of patients<br>(female) | O-GlcNAc |      | Chi-Square | <i>p</i> value |
|------------------------------|-----------------------------|----------|------|------------|----------------|
|                              |                             | low      | high |            |                |
| <b>Age</b>                   |                             |          |      |            |                |
| < 50                         | 70                          | 32       | 38   | 0.002119   | 0.9633         |
| ≥ 50                         | 75                          | 34       | 41   |            |                |
| <b>Grade</b>                 |                             |          |      |            |                |
| 1                            | 31                          | 19       | 12   | 3.956      | 0.0467*        |
| 2 + 3                        | 114                         | 47       | 67   |            |                |
| <b>Stage</b>                 |                             |          |      |            |                |
| 0 + I                        | 10                          | 6        | 4    | 0.3895     | 0.5326         |
| II + III                     | 135                         | 60       | 75   |            |                |
| <b>T classification</b>      |                             |          |      |            |                |
| Tis + T1 + T2                | 93                          | 48       | 45   | 3.886      | 0.0487*        |
| T3 + T4                      | 52                          | 18       | 34   |            |                |
| <b>N classification</b>      |                             |          |      |            |                |
| N0 + N1                      | 119                         | 62       | 57   | 11.6       | 0.0007***      |
| N2 + N3                      | 26                          | 4        | 22   |            |                |
| <b>Lymph node metastasis</b> |                             |          |      |            |                |
| No                           | 96                          | 51       | 45   | 6.63       | 0.01*          |
| Yes                          | 49                          | 15       | 34   |            |                |
| <b>PR</b>                    |                             |          |      |            |                |
| Negative                     | 107                         | 43       | 64   | 4.678      | 0.0306*        |
| Positive                     | 38                          | 23       | 15   |            |                |
| <b>ER</b>                    |                             |          |      |            |                |
| Negative                     | 110                         | 47       | 63   | 1.43       | 0.2317         |

|          |    |    |    |         |        |
|----------|----|----|----|---------|--------|
| Positive | 35 | 19 | 16 |         |        |
| HER2     |    |    |    |         |        |
| Negative | 65 | 29 | 36 | 0.03864 | 0.8442 |
| Positive | 80 | 37 | 43 |         |        |

High group: IHC score  $\geq 3$  (median score), low group: IHC score  $< 3$ , \* $p < 0.05$ , \*\*\* $p < 0.001$ .

### Appendix Table S4

Clinical characteristics of breast cancer patient samples.

| Patient no. | Gender | Age | Grade | Stage | ER       | PR       | HER2     | Chemotherapy-resistant /relapsed |
|-------------|--------|-----|-------|-------|----------|----------|----------|----------------------------------|
| 1#          | Female | 67  | 2     | II    | Positive | Positive | Positive | No                               |
| 2#          | Female | 52  | 2     | II    | Negative | Negative | Positive | No                               |
| 3#          | Female | 44  | 3     | III   | Negative | Negative | Positive | Yes                              |
| 4#          | Female | 48  | 3     | III   | Negative | Negative | Negative | Yes                              |
| 5#          | Female | 58  | 3     | III   | Positive | Positive | Positive | Yes                              |

**Appendix Table S5**

| Full-length human wild type and O-GlcNAcylation site mutants TOP2A | Forward                                              | Reverse                                                               |
|--------------------------------------------------------------------|------------------------------------------------------|-----------------------------------------------------------------------|
| Subclone into pLVX-IRES-Neo vector                                 | TTCCTCGAGGCCACCAT<br>GTACCCATACGATGTTCC<br>AGATTACG  | ATCCGCGGCCGCTTA<br>AAACAGATCATCTTC<br>ATCTGAC                         |
| <i>O</i> -GlcNAcylation site mutant (Ser1469 → Ala) TOP2A          | GAATCGCCGCAAAGG<br>AAGCCAGCAACTTCTGA<br>TGATTCTGACTC | GAGTCAGAATCATCA<br>GAAGTTGCTGGCTTC<br>CTTTTGC GGCGATTC                |
| Truncated TOP2A-A                                                  | Forward                                              | Reverse                                                               |
| Subclone into pET28a(+) vector                                     | TTCGAGCTCATGGAAGT<br>GTCACCATTGCAG                   | CTTGTCGACAATACC<br>ACAGCCAATGGCAG                                     |
| Subclone into pCMV vector                                          | CGGGTCGACATGGAAGT<br>GTCACCATTGCAG                   | CTTGGGCCCTCAATG<br>GTGATGGTGATGATG<br>AATACCACAGCCAAT<br>GGCAG        |
| Truncated TOP2A-B                                                  | Forward                                              | Reverse                                                               |
| Subclone into pET28a(+) vector                                     | TTCGAGCTCGTAGAAAG<br>CATACTAAACTGGG                  | CTTGTCGACGGTTGT<br>AGAATTAAGAATAGC<br>TAC                             |
| Subclone into pCMV vector                                          | CGGGTCGACATGGTAGA<br>AAGCATACTAAACTGGG               | CTTGGGCCCTCAATG<br>GTGATGGTGATGATG<br>GGTTGTAGAATTAAG<br>AATAGCTAC    |
| Truncated TOP2A-C                                                  | Forward                                              | Reverse                                                               |
| Subclone into pET28a(+) vector                                     | TTCGAGCTCATTGAAAT<br>CTCAGAGCTTCCC                   | CTTGTCGACAAACA<br>GATCATCTTCATCTG<br>AC                               |
| Subclone into pCMV vector                                          | CGGGTCGACGCCACCAT<br>GATTGAAATCTCAGAGC<br>TCCC       | CTTGGGCCCTCAATG<br>GTGATGGTGATGATG<br>AAACAGATCATCTTC<br>ATCTGAC      |
| Flag-tagged human full-length OGT                                  | Forward                                              | Reverse                                                               |
| Subclone into pcDNA3.1 vector                                      | CTTGGTACCATGGCGTC<br>TTCCGTGGGC                      | AGTGGATCCTCACTT<br>ATCGTCGTCATCCTT<br>GTAATCTGCTGACTC<br>AGTGA CTCAAC |
